# Supplementary material for: Isoprene and monoterpene emissions from alder, aspen and spruce short rotation forest plantations in the UK
Source: Copernicus journal article supplement (doi:10.5194/bg-2020-437), 2020-12-11

## **Supplementary Information**

### **Isoprene and monoterpene emissions from alder, aspen and spruce short rotation forest plantations in the UK**

Gemma Purser<sup>\*12</sup>, Julia Drewer<sup>1</sup>, Mathew R. Heal<sup>2</sup>, Robert A. S. Sircus<sup>2</sup>, Lara K. Dunn<sup>2</sup>, James I. L. Morison<sup>3</sup>

<sup>1</sup> UK Centre for Ecology & Hydrology, Bush Estate, Penicuik, Midlothian, EH26 0QB, UK

<sup>2</sup> School of Chemistry, University of Edinburgh, Joseph Black Building, David Brewster Road, Edinburgh, EH9 3FJ, UK

<sup>3</sup> Forest Research, Alice Holt Lodge, Farnham, Surrey, GU10 4TT, UK

\*Corresponding author

### **Content**

Supplementary S1 – Meteorological data measured during the chamber sampling campaign from May 2018 until July 2019 at the East Grange SRF trial site. (Occasional missing data due to power failure at the site.) Rainfall data was provided by SEPA for the Saline rainfall monitoring station (56.115°N 3.574°W), approximately 4 km north-east of East Grange.

Supplementary S2 – Summary data for PAR and air temperature measured at the East Grange field site, Fife, Scotland. Missing data was gap filled with Easter Bush field data, Midlothian, Scotland and the summary data presented here reflects this. The data represented here was used for modelling annual BVOC emissions from Sitka spruce, hybrid aspen and Italian alder using the MEGAN 2.1 model.

Supplementary S3 – Summary data for PAR and air temperature measured at the Alice Holt field site, south England. This data was used for modelling annual BVOC emissions from Sitka spruce, hybrid aspen and Italian alder using the MEGAN 2.1 model.

**Supplementary S1 – Meteorological data measured during the chamber sampling campaign from May 2018 until July 2019 at the East Grange SRF trial site. (Occasional missing data due to power failure at the site.) Rainfall data was provided by SEPA for the Saline rainfall monitoring station (56.115°N 3.574°W), approximately 4 km north-east of East Grange.**

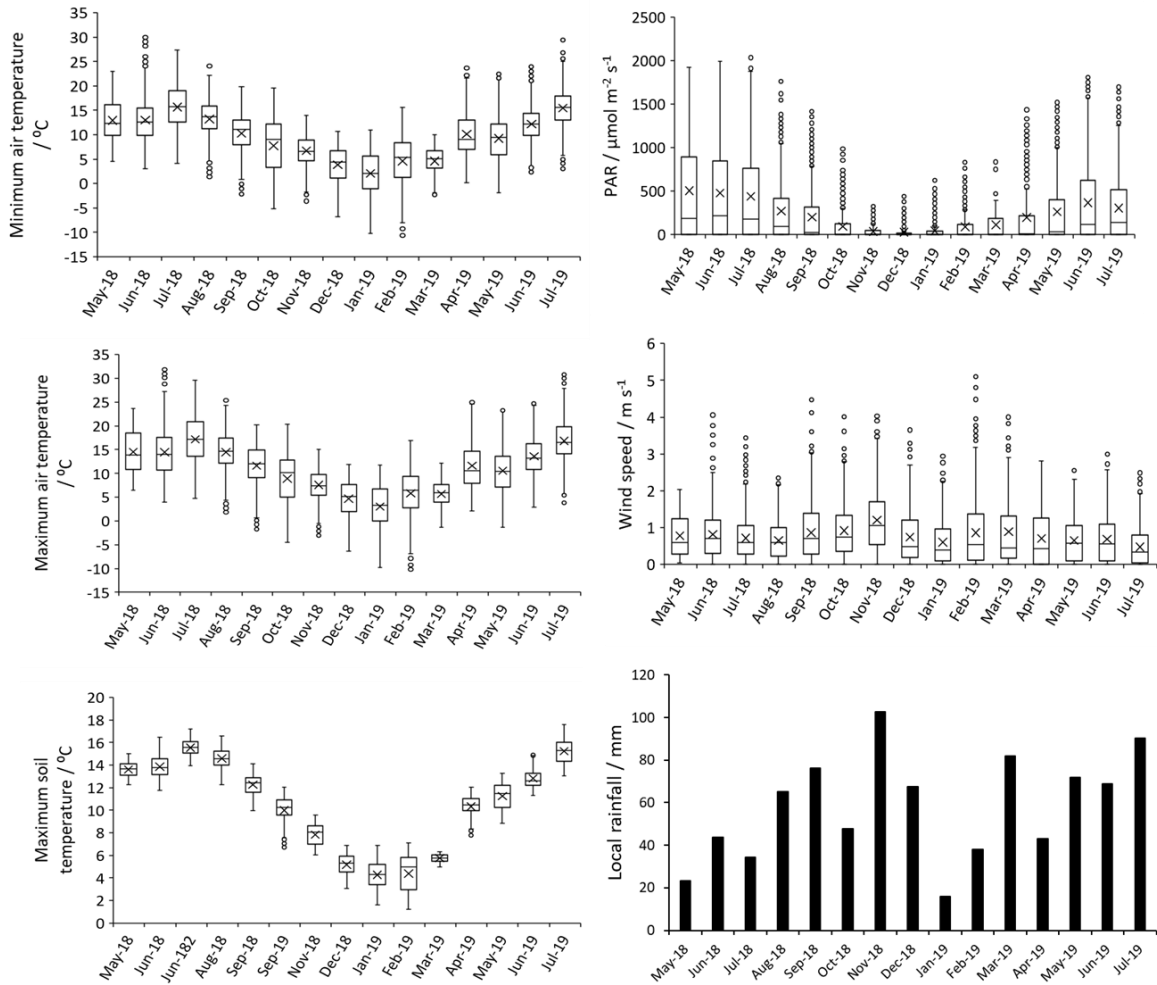

**Supplementary S2 – Summary data for PAR and air temperature measured at the East Grange field site, Fife, Scotland. Missing data was gap filled with Easter Bush field data, Midlothian, Scotland and the summary data presented here reflects this. The data represented here was used for modelling annual BVOC emissions from Sitka spruce, hybrid aspen and Italian alder using the MEGAN 2.1 model.**

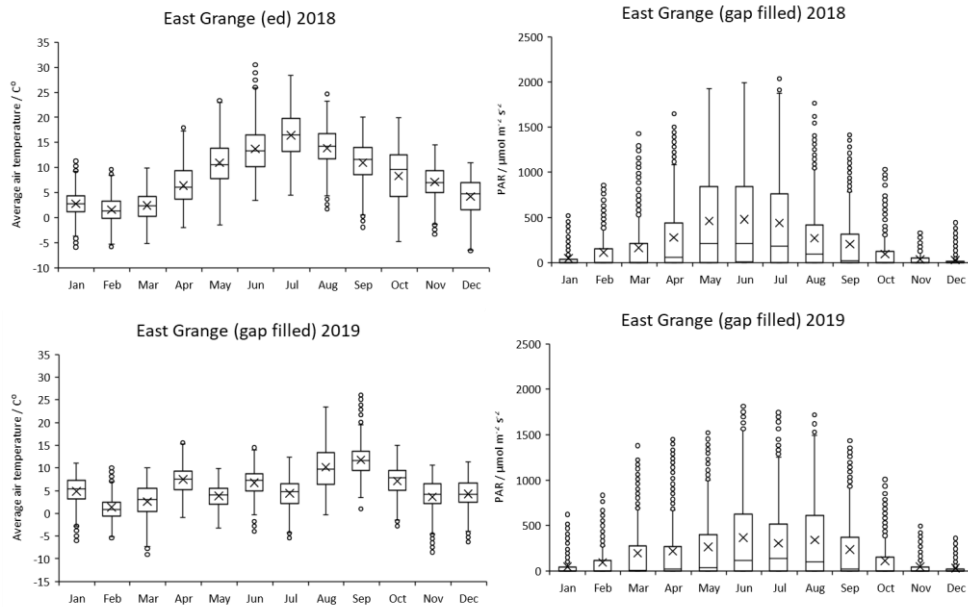

**Supplementary S3 – Summary data for PAR and air temperature measured at the Alice Holt field site, south England. This data was used for modelling annual BVOC emissions from Sitka spruce, hybrid aspen and Italian alder using the MEGAN 2.1 model.**

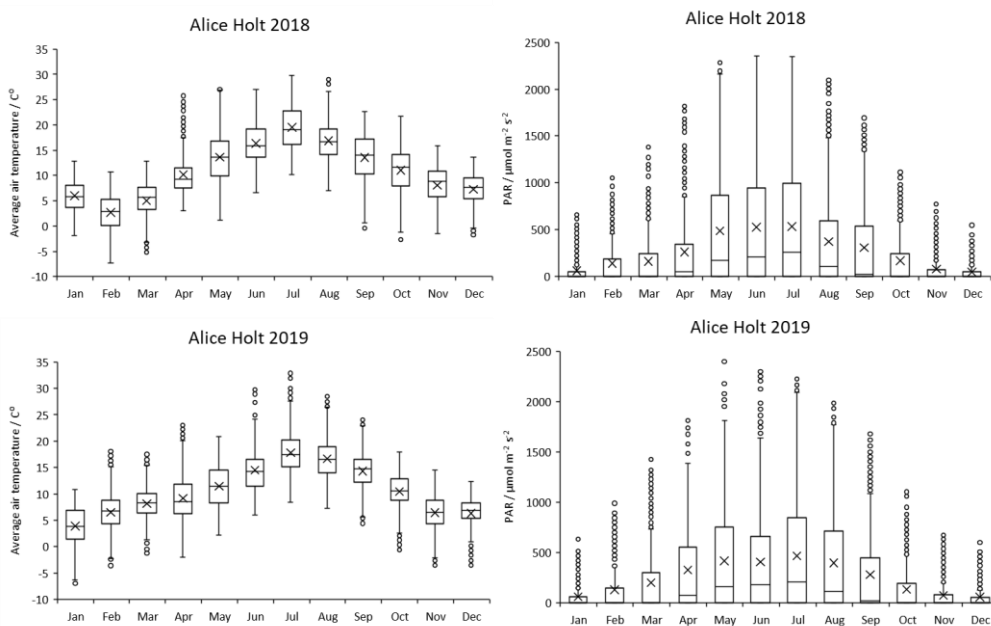

Supplement: Supplementary file 1 [file bg-2020-437-supplement.pdf]
