# Supplementary material for: Isoprene and monoterpene emissions from alder, aspen and spruce short rotation forest plantations in the UK
Source: Copernicus journal article supplement (doi:10.5194/bg-2020-437), 2020-12-11
Supplement: Supplementary file [file bg-2020-437-AC1-supplement.pdf]

## **bg-2020-437: Isoprene and monoterpene emissions from alder, aspen and spruce short rotation forest plantations in the UK**

### **Response to reviewer Andrew Leslie**

General comments:

Interesting study that is nicely written with excellent referencing – just one minor mistake. The research contributes to an area that has had relatively little work undertaken in the UK. Data collection methods are sensible.

Response: We thank Andrew Leslie for his time spent reading our manuscript and for his comments and suggestions to improve the manuscript. Below we respond to each review comment individually (in blue font), indicating changes made to the revised manuscript.

Individual issues:

Figure 1,2 and 3 show error bars and yet there has been no discussion about whether the data were normally distributed. This is also the case in the text as standard deviations and errors are mentioned. If the data are non parametric then medians and interquartile ranges would be more appropriate.

Response: We agree the data are highly likely to be non-normal, so to provide the reader with all information we now supply the additional data of median and interquartile range in a separate table in the Supplementary Information. We retain presentation and use of mean emissions in the main manuscript as this is what is typically used in the literature (for our literature comparison) and because it is the mean that forms the basis of scale-up to area-based and annual emissions in sections 3.5-3.7. The standard deviation is still a useful summary of the degree of variability in the measurements presented. The following text was added on line 446-447.

“The equivalent median and interquartile ranges for the data collected during this study can be found in the Supplementary Information S4”.

The abbreviation MT is used for monoterpenes but not explained in the text.

Response: We have now added “MT = Monoterpene” to the captions of Table 4, Table 5, Table 6 and Table 8.

Table 4, Table 7 Figure 1 and Figure 3 the title states that averages are presented. An average could be the mean, mode or median so use the term, ‘mean’. See comment above about normality of the data.

Response: All instances of the word “average” in the text and relevant figure and table captions have now been replaced with the term “mean”.

Specific comments:

Line Comment

16 This expansion rather than that expansion

Response: Amended as suggested.

52 Expand briefly on why more domestic bioenergy is required. Why cannot we import it all?

Response There is likely to be a significantly higher carbon cost associated with the import of biomass than with a domestic source of biomass (Ricardo Energy & Environment, 2020). If the UK (and indeed the world) is to reduce GHG emissions to the point of net zero then these additional carbon costs should be minimized. For clarification the following text was added to lines 51-54:

“However, importing biomass contributes higher carbon emissions than biomass grown in the UK (Ricardo Energy & Environment, 2020) so a larger contribution from domestic supply of bioenergy in the UK is required if the UK is to achieve net-zero.”

54 Willow (*Salix* spp.)

Response: Amended as suggested in line 56

69 Give scientific names in brackets after first mention of common names of the trees.

Response: The text has now been replaced with the following text in lines 71-76: “(hybrid aspen (*Populus tremula* L. x *tremuloides* Michx.), red alder (*Alnus rubra* Bong.), common alder (*Alnus glutinosa* (L.) Gaertn), Italian alder (*Alnus cordata* Desf.), sycamore (*Acer pseudoplatanus*), Sweet chestnut (*Castanea sativa* Mill.), eucalyptus spp. (*Eucalyptus gunnii*, *Eucalyptus nitens* (Vic), *Eucalyptus nitens* (NSW), *E. glaucescens*) and the two conifer species Sitka spruce (*Picea sitchensis* Bong. Carr) and hybrid larch (*Larix x marschlinsii* Coaz) (Harrison, 2010)”

101 growth in SRF not growth during

Response: Amended as suggested.

135 Guenther et al 2012

Response: Amended as suggested.

153 Soil not soils

Response: Amended as suggested.

193 Three similar branches. How were these sampled to ensure they were representative?

Response: A line has been added to the text in lines 201-203 for further clarification:

“The branches were selected to be of similar size and in a similar position on the tree. All branches were approximately 1.5 m from the ground and in a south-facing position.”

204 Ensure a sufficient

Response: Amended as suggested

261 Can be standardised to... is this the convention or is it a standard you have decided on?

Response: The emission rates were standardised to 30 °C and 1000 mol m<sup>-2</sup> s<sup>-1</sup> based on the findings of Guenther et al (1993, 1991). This standardisation is almost universally used by the biosphere-atmosphere community to enable the comparison of BVOC emissions from different species measured under different ambient conditions. Clarification is now made by replacing “can be” to “were” in line 271.

280 replace Guenther et al. 1993 with G93 as previously stated

Response: Amended as suggested in line 292.

347 Scaling for spring and summer – do you have any justification for using 25% and 50%?

Response: In the absence of multiple LAI measurements taken across the year at the East Grange site the observations of a deciduous forest in the UK by Ogunbadewa et al.(2012) were adopted as the basis for this scaling used in the modelling part of our study. To make this clear to the reader the manuscript has been modified on lines 327-332 to:

“In measurements of LAI by Ogunbadewa et al. (2012), taken across a year in a deciduous forest in the UK, the LAI was at its maximum by July and during spring the LAI increased such that it was around a quarter of the maximum by late April and around a half by mid-May. These seasonal changes in LAI were therefore adopted for use in the MEGAN 2.1 model (Table 2) in the absence of multiple seasonal LAI measurements taken at East Grange during our study.”

356 Justify assumption that emissions driven by temperature. Are there studies to support this?

Response: Additional references have been added and the text reworded for clarification in lines 401-406 as follows:

“Although some individual monoterpene compounds may be produced in the leaves in response to light and temperature to varying degrees, due to the use of the collective “total monoterpenes” as a model input the simplification was used that monoterpene emissions were driven by temperature only and no light specific emission factor was applied (Guenther et al., 2006, 1993).”

435 Alder sp. ie one species or alder spp. more than one species. Alder should start with a lower case a ie alder

Response: “alder spp.” has been added to line 456-457 in manuscript.

518 Delete the Sitka spruce title in the graph

Response: Amended in manuscript.

544 They may be vegetatively propagated but they have been from different crosses so there is genetic variation between individuals. Indeed there may be more genetic variation than from seed collected from an individual stand.

Response: The text has been modified to make our suggestion more speculative, lines 566-567:

“This may reflect that the trees grown via vegetative propagation could be from a genetically similar source.”

610 Underneath aspen (*Populus tremula*) trees....

Response: Amended in manuscript in line 633.

612 American aspen (*Populus tremuloides*)

Response: Amended in manuscript in line 635.

613 Although are not chemically...

Response: Amended in manuscript in line 636.

670 conifer spp.

Response: Amended in manuscript in line 689.

724-728 Perhaps provide some commentary on the large disparity between your estimate of isoprene emissions and Beverland's

Response: The following additional clarification as to why there may have been a large disparity is added to lines 252-254.

“These emissions are much lower than our model estimates although it was reported that there were analytical difficulties with the micrometeorological techniques and limited data which could account for this disparity.”

753 You use the abbreviations EG and AH for the two sites for the first time towards the end of the paper. Either use these consistently throughout the manuscript or not.

Response: The instance where EG and AH have been used are now replaced with “East Grange” and “Alice Holt” respectively for consistency with the earlier part of the manuscript. The amendments apply to lines:770, 771, 780, 782-784

798 Different effects in the short term

Response: Amended in manuscript on line 837.

869 Make it clearer Conclusions is a heading

Response: The conclusion title has now been repositioned to line 909 and given the section heading number 4.

## References

- Guenther, A., Karl, T., Harley, P., Wiedinmyer, C., Palmer, P.I., Geron, C., 2006. Estimates of global terrestrial isoprene emissions using MEGAN (Model of Emissions of Gases and Aerosols from Nature). *Atmos. Chem. Phys.* 6, 3181–3210. <https://doi.org/10.5194/acp-6-3181-2006>
- Guenther, A.B., Monson, R.K., Fall, R., 1991. Isoprene and monoterpene emission rate variability: Observations with eucalyptus and emission rate algorithm development. *J. Geophys. Res. Atmos.* 96, 10799–10808. <https://doi.org/https://doi.org/10.1029/91JD00960>
- Guenther, A.B., Zimmerman, P.R., Harley, P.C., Monson, R.K., Fall, R., 1993. Isoprene and monoterpene emission rate variability: model evaluations and sensitivity analyses. *J. Geophys. Res.* 98. <https://doi.org/10.1029/93jd00527>
- Ogunbadewa, E.Y., 2012. Tracking seasonal changes in vegetation phenology with a SunScan canopy analyzer in northwestern England. *Forest Sci. Technol.* 8, 161–172. <https://doi.org/10.1080/21580103.2012.704971>
- Ricardo Energy & Environment, 2020. Analysing the potential of bioenergy with carbon capture in the UK to 2050 [WWW Document]. URL <https://www.gov.uk/government/publications/the-potential-of-bioenergy-with-carbon-capture>
