# Supplementary material for: Isoprene and monoterpene emissions from alder, aspen and spruce short rotation forest plantations in the UK
Source: Copernicus journal article supplement (doi:10.5194/bg-2020-437), 2020-12-11
Supplement: Supplementary file [file bg-2020-437-RC1-supplement.pdf]

### General comments:

Interesting study that is nicely written with excellent refencing – just one minor mistake. The research contributes to an area that has had relatively little work undertaken in the UK. Data collection methods are sensible.

### Individual issues:

Figure 1,2 and 3 show error bars and yet there has been no discussion about whether the data were normally distributed. This is also the case in the text as standard deviations and errors are mentioned. If the data are non parametric then medians and interquartile ranges would be more appropriate.

The abbreviation MT is used for monoterpenes but not explained in the text.

Table 4, Table 7 Figure 1 and Figure 3 the title states that averages are presented. An average could be the mean, mode or median so use the term, 'mean'. See comment above about normality of the data.

### Specific comments:

| Line    | Comment                                                                                                                                                                                                                        |
|---------|--------------------------------------------------------------------------------------------------------------------------------------------------------------------------------------------------------------------------------|
| 16      | This expansion rather than that expansion                                                                                                                                                                                      |
| 52      | Expand briefly on why more domestic bioenergy is required. Why cannot we import it all?                                                                                                                                        |
| 54      | Willow ( <i>Salix</i> spp.)                                                                                                                                                                                                    |
| 69      | Give scientific names in brackets after first mention of common names of the trees.                                                                                                                                            |
| 101     | growth in SRF not growth during                                                                                                                                                                                                |
| 135     | Guenther et al 2012                                                                                                                                                                                                            |
| 153     | Soil not soils                                                                                                                                                                                                                 |
| 193     | Three similar branches. How were these sampled to ensure they were representative?                                                                                                                                             |
| 204     | Ensure a sufficient                                                                                                                                                                                                            |
| 261     | Can be standardised to... is this the convention or is it a standard you have decided on?                                                                                                                                      |
| 280     | replace Guenther et al. 1993 with G93 as previously stated                                                                                                                                                                     |
| 347     | Scaling for spring and summer – do you have any justification for using 25% and 50%?                                                                                                                                           |
| 356     | Justify assumption that emissions driven by temperature. Are there studies to support this?                                                                                                                                    |
| 435     | Alder sp. ie one species or alder spp. more than one species. Alder should start with a lower case a ie alder                                                                                                                  |
| 518     | Delete the Sitka spruce title in the graph                                                                                                                                                                                     |
| 544     | They may be vegetatively propagated but they have been from different crosses so there is genetic variation between individuals. Indeed there may be more genetic variation then form seed collected from an individual stand. |
| 610     | Underneath aspen ( <i>Populus tremula</i> ) trees....                                                                                                                                                                          |
| 612     | American aspen ( <i>Populus tremuloides</i> )                                                                                                                                                                                  |
| 613     | Although are not chemically...                                                                                                                                                                                                 |
| 670     | conifer spp.                                                                                                                                                                                                                   |
| 724-728 | Perhaps provide some commentary on the large disparity between your estimate of isoprene emissions and Beverland's                                                                                                             |
| 753     | You use the abbreviations EG and AH for the two sites for the first time towards the end of the paper. Either use these consistently throughout the manuscript or not.                                                         |
| 798     | Different effects in the short term                                                                                                                                                                                            |

|     |                                          |
|-----|------------------------------------------|
| 869 | Make it clearer Conclusions is a heading |
|-----|------------------------------------------|
